# Supplementary material
Source: publisher figshare collection journal article supplement (https://gsapubs.figshare.com/ndownloader/files/22397802)

# The Geology of Golconda Canyon, Southern Tobin Range, Pershing County Nevada

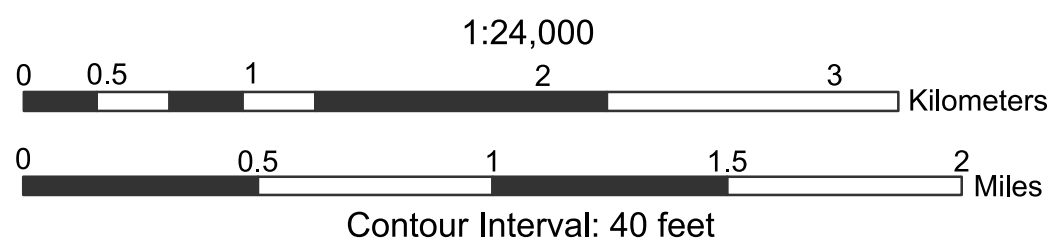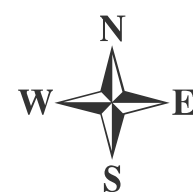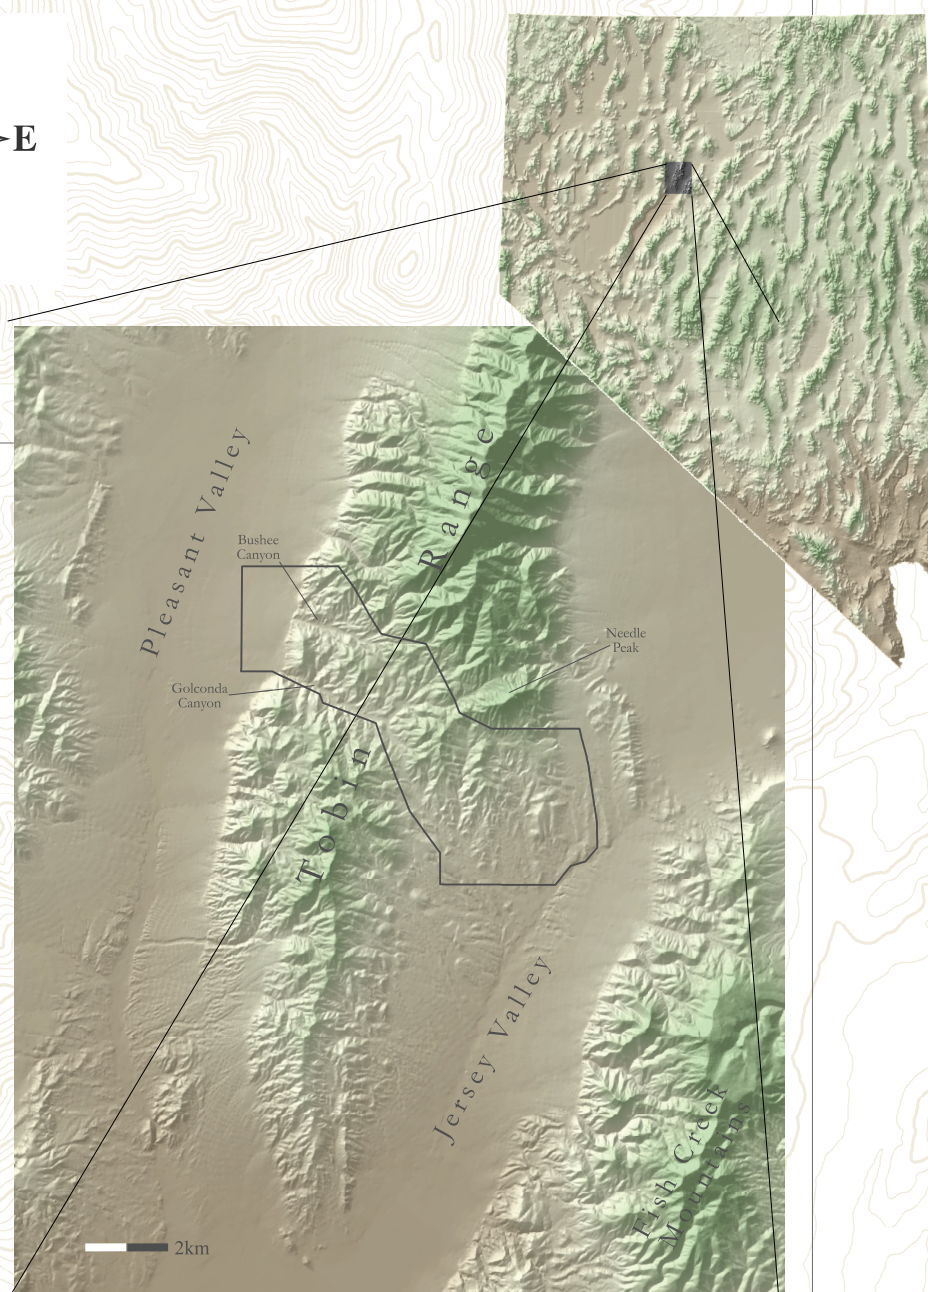

## Geologic Units

|            |      |                                                                                                                                                                                                                                         |
|------------|------|-----------------------------------------------------------------------------------------------------------------------------------------------------------------------------------------------------------------------------------------|
| Quaternary | Qya  | Younger alluvium - Alluvial deposits of present day drainage                                                                                                                                                                            |
|            | Qoa  | Older alluvium - Alluvial deposits above present day drainage which still retain original depositional morphology                                                                                                                       |
|            | Qg   | Older gravel - Poorly sorted gravels above present day drainage which no longer display original depositional morphology. Includes deposits localized along major NW trending fault derived primarily from Mesozoic and Paleozoic rocks |
| Tertiary   | Qls  | Landslide deposits - Coarse, unsorted blocks derived from neighboring units                                                                                                                                                             |
|            | Tyb  | Younger basalt - Aphyric basalt (includes associated dikes and sills)                                                                                                                                                                   |
|            | Ts   | Sedimentary rocks - Pale-colored, fluvial and lacustrine, tuffaceous siltstone, mudstone and sandstone with minor limestone                                                                                                             |
|            | Tri  | Rhyolite ignimbrite - Yellow crystal-rich welded rhyolite ignimbrite                                                                                                                                                                    |
|            | Tsc  | Sedimentary rock (Tsc) - Poorly bedded volcanic conglomerate and muddy sandstone with clasts of andesite and Fish Creek Mountains Tuff                                                                                                  |
|            | Trx  | Rhyolite landslide breccia (Trx) - Large blocks of crystal-rich pink to red rhyolite ignimbrite and white pumice-rich poorly welded ignimbrite derived from the Tfc                                                                     |
|            | Tlx  | Limestone landslide breccia (Tlx) - Large blocks of massive dark gray limestone derived from the Natchez Pass Formation                                                                                                                 |
|            | Tfc  | FISH CREEK MOUNTAINS TUFF - Pink to red crystal-rich welded rhyolite ignimbrite                                                                                                                                                         |
|            | Trip | Pumice rhyolite ignimbrite - Gray, pumice-rich, crystal poor rhyolite ignimbrite                                                                                                                                                        |
|            | Tal  | Andesite lava flows and lahars (Tal) - Massive lava flows with intercalated lahar deposits and andesitic sedimentary rock                                                                                                               |
| Jurassic   | Tau  | Andesite ignimbrite (Tai) - Poorly to moderately welded ignimbrites with subordinate rhyolite landslide breccia                                                                                                                         |
|            | Tau  | Undifferentiated andesite (Tau)                                                                                                                                                                                                         |
|            | Trib | Biotite rhyolite ignimbrite - Crystal-rich white to purple rhyolite ignimbrite with abundant biotite                                                                                                                                    |
|            | Tct  | CAETANO TUFF - Pink to reddish-brown crystal and pumice-rich rhyolite ignimbrite. Grades from poorly welded lower part to moderately welded upper part                                                                                  |
|            | Tob  | Older basalt - Altered basalt with abundant chalcedony                                                                                                                                                                                  |
|            | Jgd  | Granodiorite and granodiorite porphyry                                                                                                                                                                                                  |
|            | Fos  | OSOBB FORMATION - Pale colored siliceous and calcareous sandstone                                                                                                                                                                       |
|            | Fnp  | NATCHEZ PASS FORMATION - Massive dark gray to brown poorly bedded limestone                                                                                                                                                             |
|            | Fcm  | CHINA MOUNTAIN FORMATION - Pale-colored quartz and rhyolite pebble conglomerates, tuffaceous sandstone and lesser amounts of rhyolite                                                                                                   |
|            | Ph   | HAVALLAH FORMATION - Deformed chert, argillite, sandstone and micritic limestone                                                                                                                                                        |

## Strike and Dip

- Bedding planes
- Bedding planes (uncertain)
- Compaction foliation
- Compaction foliation (uncertain)
- Flow layering
- Flow layering (uncertain)

## Contacts

- Well located ( $\pm 20$ m)
- Approximately located ( $\pm 20$  to  $50$ m)
- Very approximately located ( $> \pm 50$ m)

## Faults

- Normal faults with ball and bar on downthrown side
- Well located ( $\pm 20$ m)
- Approximately located ( $> \pm 20$ m), queried where existence uncertain
- Concealed

## Folds

- Anticline
- Syncline

## Other Features

- TR-9 Radiometric age determination and sample number
- Drill hole
- Mine tunnel
- Prospect
- Shaft
- Springs
- Ranch
- Road

Geology and Cartography by Zac Gonsior  
2004, 2005  
Projection: Transverse Mercator  
Coordinate System: NAD 1983 UTM Zone 11  
Data Sources: 7.5i USGS topographic maps,  
10 meter DEM from National Elevation Dataset  
NV inset map created from GTOPO30 DEM

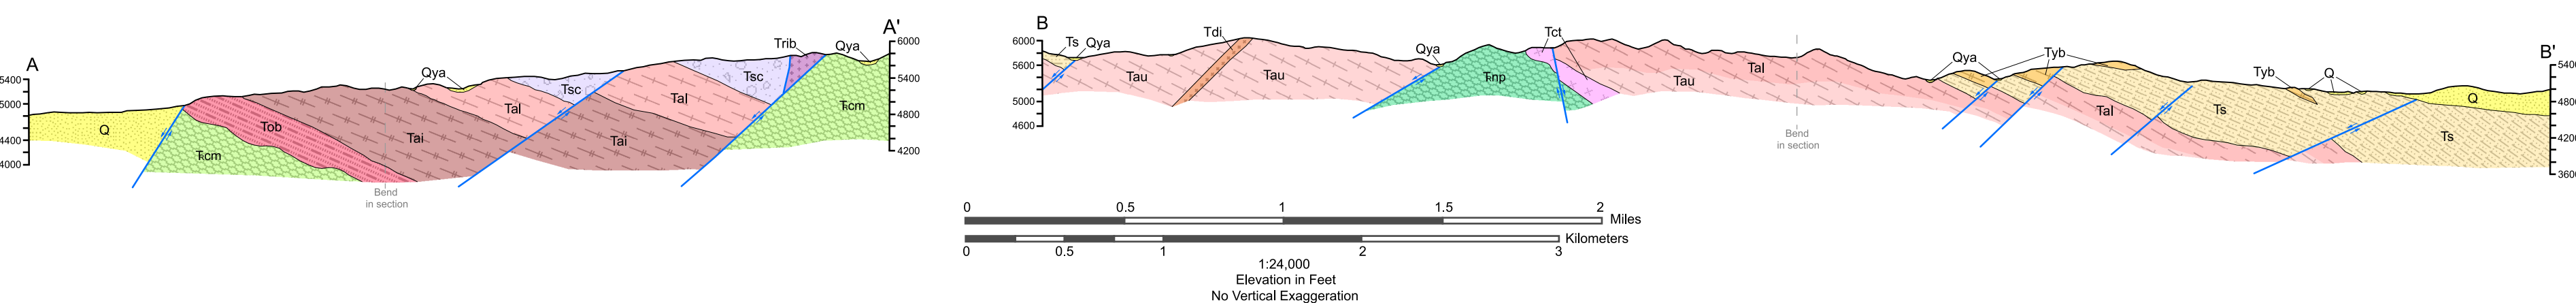

Supplement: Supplementary file 1 [file 22397802]
